# Supplementary material for: Polypropylene CD-organic light-emitting diode biosensing platform
Source: Royal Society of Chemistry journal article supplement (doi:10.1039/b923689a), 2010-01-01
Supplement: supplementary_information.pdf [file supplementary_information.pdf]

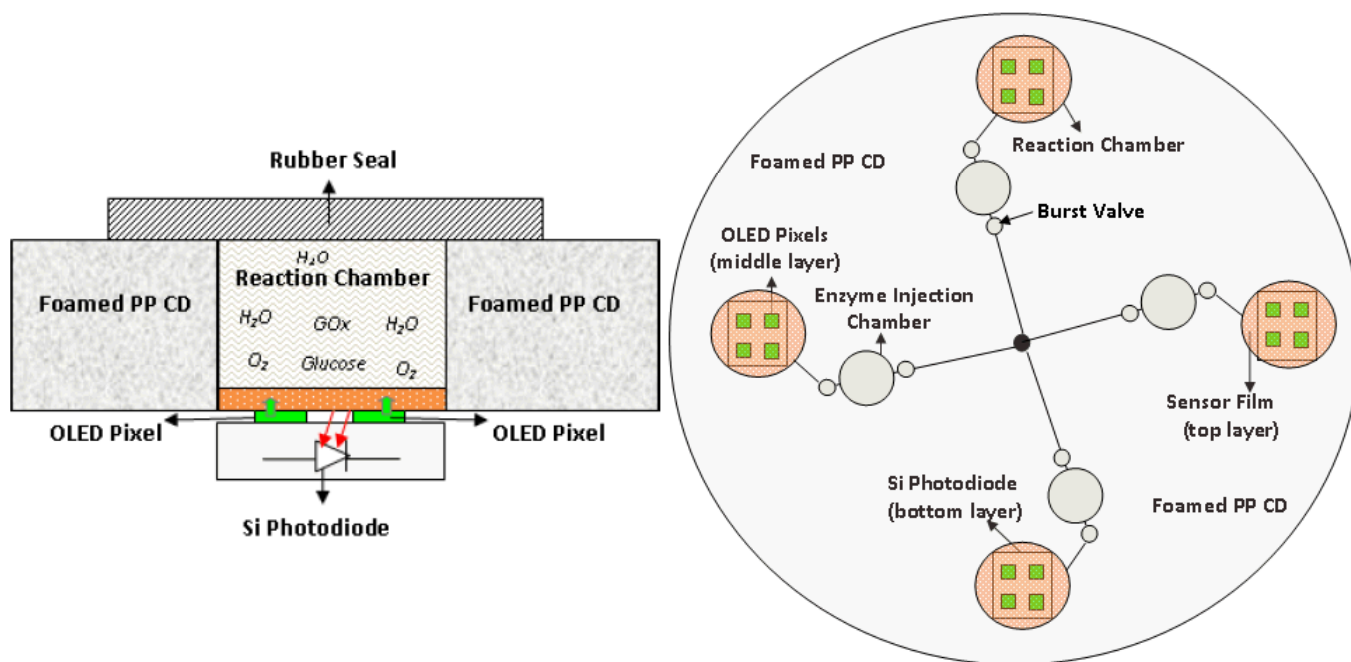

The foamed polypropylene CD-OLED sensing platform. Left: side view of a single sensor; Right: top view of the multiple analyte platform. The drawings are not to scale.
